# Supplementary material
Source: PubMed Central journal article supplement (PMC10763621)

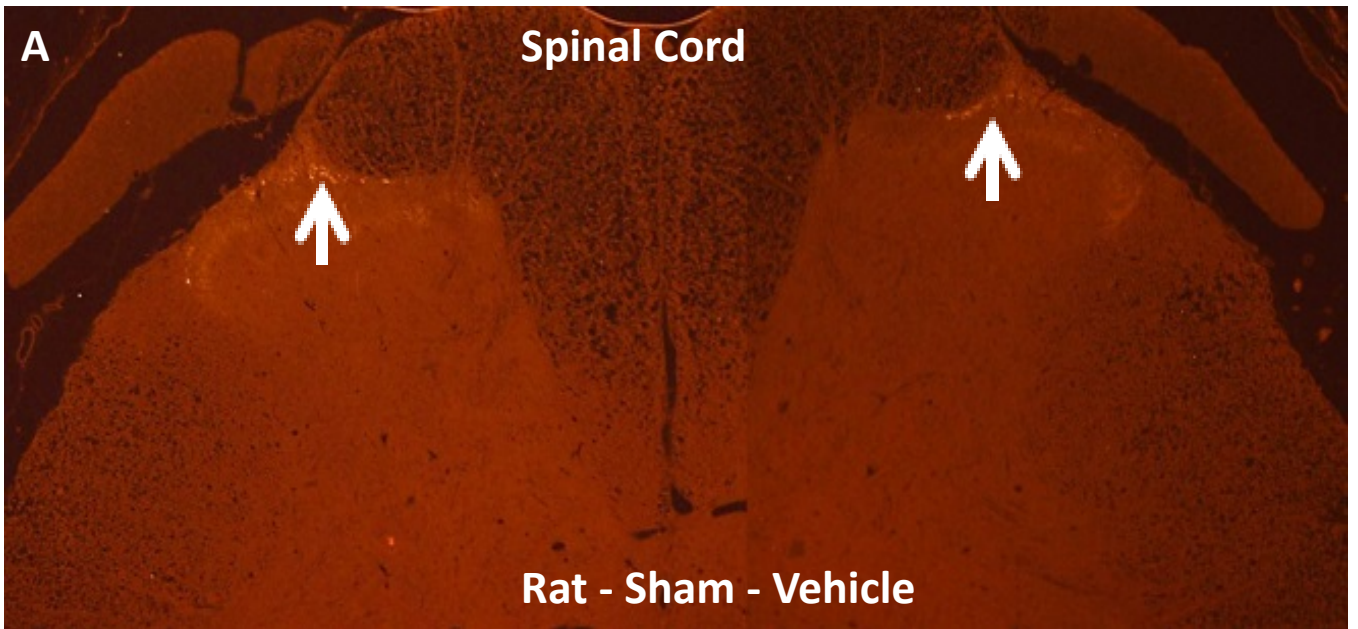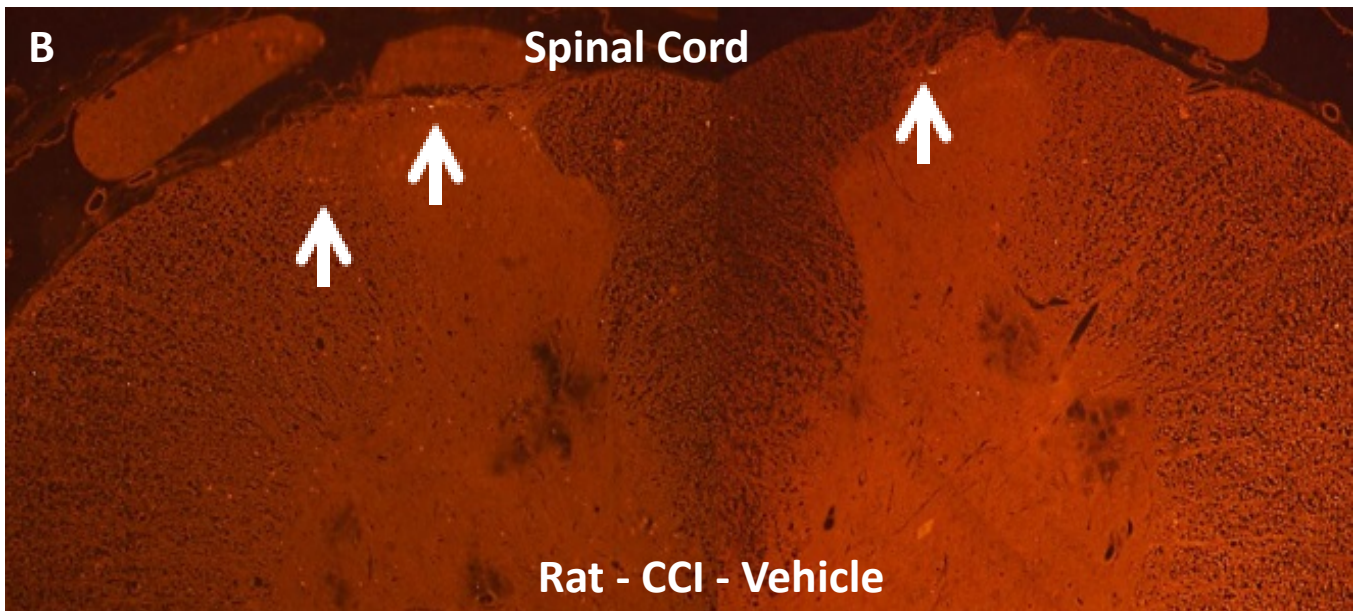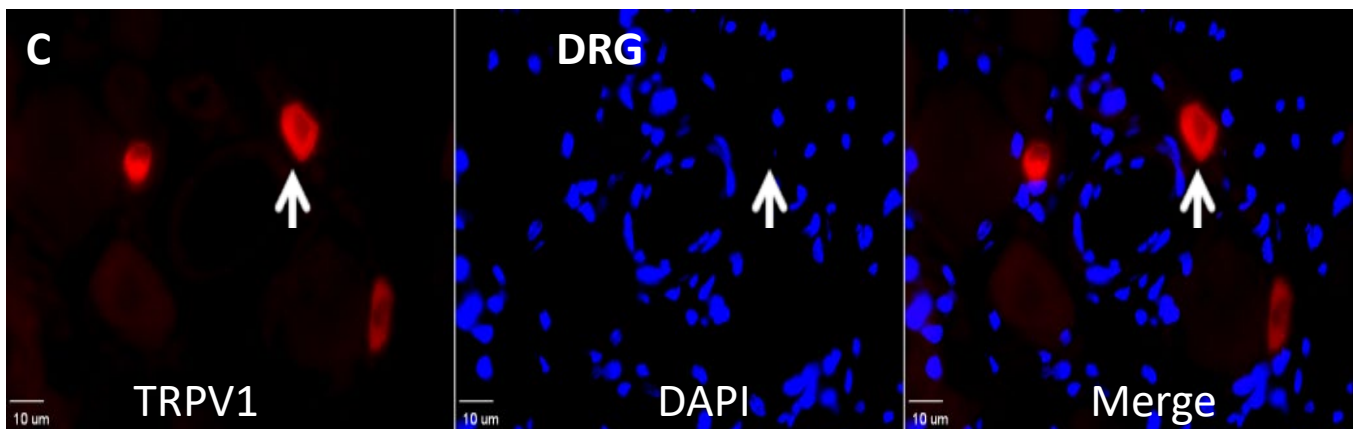

# Intrathecal AM1710

Ipsilateral

Contralateral

**A**

**B**

$\triangle$  TRPV1<sup>(+/-)</sup> - Sham - Veh     $\nabla$  TRPV1<sup>(+/-)</sup> - Sham - AM1710  
 $\blacktriangle$  TRPV1<sup>(+/-)</sup> - CCI - Veh     $\triangleleft$  TRPV1<sup>(+/-)</sup> - CCI - AM1710

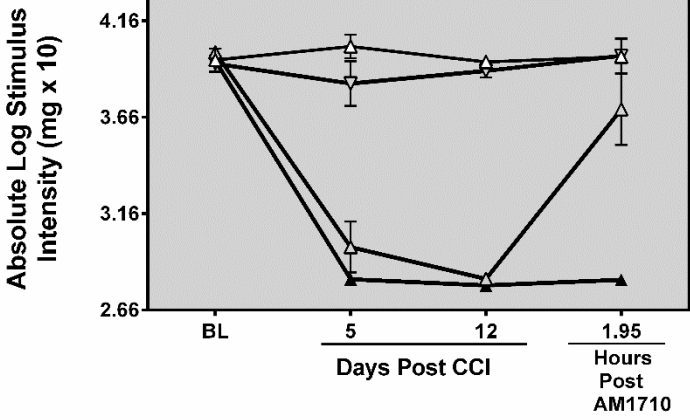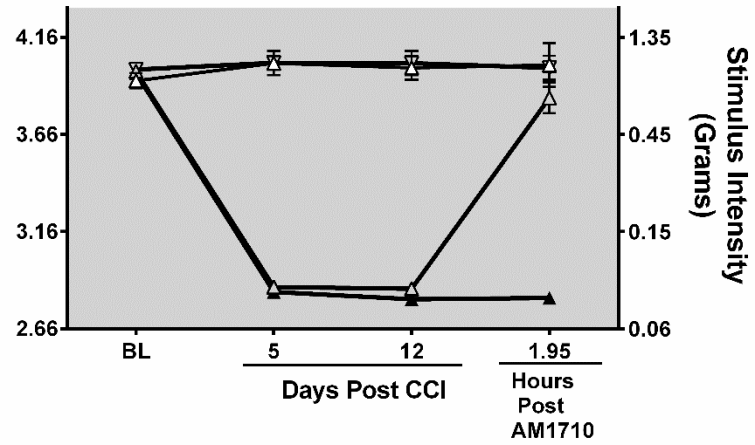

Contralateral

**C**

Spinal Cord

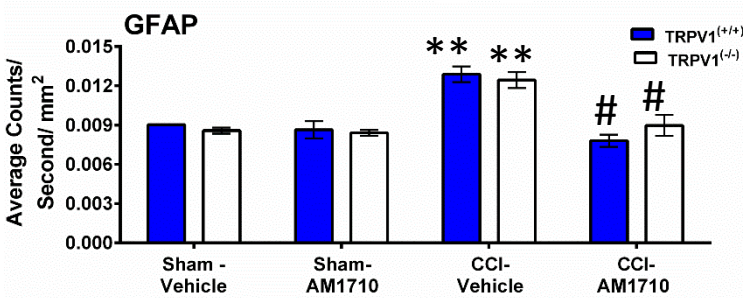

**D**

Spinal Cord

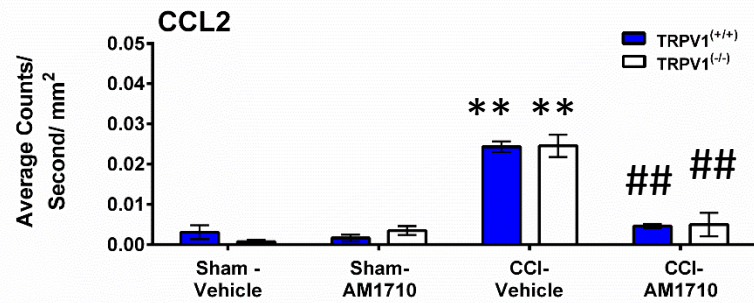

**E**

DRG

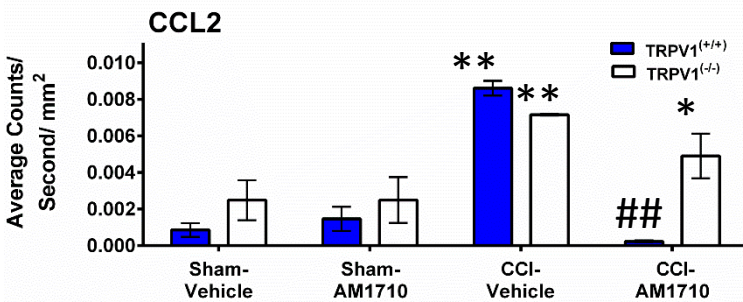

Supplement: NIHMS1948574-supplement-Suppl_Figs_1_and_2.pdf [file NIHMS1948574-supplement-Suppl_Figs_1_and_2.pdf]
